# Supplementary material for: Biogeochemical cycling at the aquatic–terrestrial interface is linked to parafluvial hyporheic zone inundation history
Source: Copernicus journal article supplement (doi:10.5194/bg-14-4229-2017), 2017-09-21
Supplement: Supplementary file [file bg-14-4229-2017-supplement.pdf]

Supplement of Biogeosciences, 14, 4229–4241, 2017  
<https://doi.org/10.5194/bg-14-4229-2017-supplement>  
© Author(s) 2017. This work is distributed under  
the Creative Commons Attribution 3.0 License.

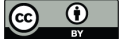

*Supplement of*

## **Biogeochemical cycling at the aquatic–terrestrial interface is linked to parafluvial hyporheic zone inundation history**

**Amy E. Goldman et al.**

*Correspondence to:* Amy E. Goldman ([amy.goldman@pnnl.gov](mailto:amy.goldman@pnnl.gov))

The copyright of individual parts of the supplement might differ from the CC BY 3.0 License.

## Supplementary material

### 5 Table S1. OTUs identified from 16S and ITS sequencing.

|                      | # OTUs |
|----------------------|--------|
| Total 16S sequencing | 9893   |
| Bacteria             | 9470   |
| Archaea              | 2313   |
| Unidentified kingdom | 305    |
| Total ITS sequencing | 1856   |
| Fungi                | 1818   |
| Unidentified kingdom | 722    |

**Table S2. Bacteria, archaea, and fungi classes with 1% abundance or greater.**

|                        | 0 d   |      | 13 d  |      | 127 d |      | 398 d |      |
|------------------------|-------|------|-------|------|-------|------|-------|------|
|                        | Mean  | SD   | Mean  | SD   | Mean  | SD   | Mean  | SD   |
| <b>Bacteria</b>        |       |      |       |      |       |      |       |      |
| Unidentified class     | 3.10  | 0.83 | 1.72  | 0.11 | 1.32  | 0.02 | 1.78  | 0.78 |
| <i>Proteobacteria</i>  |       |      |       |      |       |      |       |      |
| Betaproteobacteria     | 10.24 | 1.54 | 9.40  | 1.24 | 10.69 | 0.85 | 8.66  | 1.64 |
| Alphaproteobacteria    | 9.91  | 0.83 | 11.18 | 1.56 | 12.63 | 1.93 | 17.95 | 3.29 |
| Gammaproteobacteria    | 8.64  | 1.11 | 5.80  | 1.08 | 7.37  | 2.79 | 6.76  | 1.89 |
| Deltaproteobacteria    | 8.66  | 1.46 | 6.68  | 0.44 | 5.50  | 1.12 | 4.83  | 0.83 |
| TA18                   | 0.54  | 0.11 | 0.25  | 0.06 | 0.16  | 0.03 | 0.10  | 0.03 |
| <i>Bacteroidetes</i>   |       |      |       |      |       |      |       |      |
| Sphingobacteriia       | 10.90 | 1.77 | 12.73 | 3.23 | 16.55 | 4.29 | 14.66 | 2.40 |
| Flavobacteriia         | 2.38  | 0.71 | 1.92  | 0.82 | 2.81  | 2.39 | 1.79  | 1.36 |
| Cytophagia             | 2.32  | 0.43 | 2.66  | 1.22 | 2.83  | 1.22 | 3.17  | 0.34 |
| <i>Acidobacteria</i>   |       |      |       |      |       |      |       |      |
| Acidobacteria          | 8.13  | 1.18 | 9.46  | 1.02 | 9.62  | 2.70 | 9.03  | 0.87 |
| Subgroup 22            | 1.22  | 0.33 | 0.40  | 0.10 | 0.24  | 0.16 | 0.09  | 0.03 |
| Holophagae             | 0.62  | 0.17 | 0.62  | 0.03 | 0.66  | 0.28 | 0.78  | 0.11 |
| <i>Verrucomicrobia</i> |       |      |       |      |       |      |       |      |
| Spartobacteria         | 2.82  | 1.10 | 9.09  | 2.05 | 6.90  | 0.75 | 5.44  | 2.11 |
| Verrucomicrobiae       | 1.82  | 0.41 | 1.50  | 0.65 | 1.11  | 0.36 | 1.04  | 0.58 |
| OPB35 soil group       | 1.76  | 0.32 | 1.28  | 0.20 | 1.36  | 0.50 | 0.74  | 0.37 |
| <i>Actinobacteria</i>  |       |      |       |      |       |      |       |      |
| Actinobacteria         | 1.59  | 0.34 | 2.39  | 0.32 | 3.12  | 0.90 | 5.46  | 1.17 |
| Thermoleophilia        | 1.22  | 0.37 | 2.60  | 1.15 | 2.27  | 0.95 | 4.85  | 2.91 |
| Acidimicrobiia         | 0.48  | 0.02 | 0.60  | 0.11 | 0.46  | 0.16 | 0.63  | 0.16 |
| <i>Planctomycetes</i>  |       |      |       |      |       |      |       |      |
| Planctomycetacia       | 6.20  | 0.34 | 5.04  | 0.94 | 4.34  | 1.03 | 3.73  | 1.30 |
| Phycisphaerae          | 0.78  | 0.18 | 0.52  | 0.10 | 0.46  | 0.14 | 0.50  | 0.09 |
| <i>Nitrospirae</i>     |       |      |       |      |       |      |       |      |
| Nitrospira             | 3.12  | 0.63 | 1.62  | 0.31 | 0.95  | 0.30 | 0.75  | 0.25 |
| <i>Chloroflexi</i>     |       |      |       |      |       |      |       |      |

|                                        |       |       |       |       |       |       |       |      |
|----------------------------------------|-------|-------|-------|-------|-------|-------|-------|------|
| Anaerolineae                           | 1.43  | 0.58  | 0.52  | 0.11  | 0.26  | 0.12  | 0.23  | 0.01 |
| <i>Firmicutes</i>                      |       |       |       |       |       |       |       |      |
| Bacilli                                | 2.98  | 3.89  | 0.72  | 0.69  | 0.48  | 0.05  | 0.78  | 0.19 |
| <i>Gemmatimonadetes</i>                |       |       |       |       |       |       |       |      |
| Gemmatimonadetes                       | 1.18  | 0.48  | 0.78  | 0.06  | 0.87  | 0.56  | 1.90  | 0.49 |
| <i>Chlorobi</i>                        |       |       |       |       |       |       |       |      |
| Chlorobia                              | 0.61  | 0.11  | 0.56  | 0.07  | 0.34  | 0.10  | 0.13  | 0.03 |
| <b>Archaea</b>                         |       |       |       |       |       |       |       |      |
| <i>Thaumarchaeota</i>                  |       |       |       |       |       |       |       |      |
| Soil Crenarchaeotic Group (SCG)        | 1.92  | 1.99  | 6.61  | 3.47  | 4.08  | 1.31  | 1.77  | 1.22 |
| <b>Fungi</b>                           |       |       |       |       |       |       |       |      |
| Unidentified class                     | 22.14 | 5.30  | 14.48 | 5.25  | 11.89 | 3.51  | 28.29 | 6.66 |
| <i>Ascomycota</i>                      |       |       |       |       |       |       |       |      |
| Dothideomycetes                        | 16.48 | 9.29  | 19.68 | 5.40  | 28.25 | 5.02  | 26.59 | 7.80 |
| Eurotiomycetes                         | 1.46  | 0.65  | 2.94  | 1.12  | 2.55  | 1.22  | 2.60  | 0.83 |
| Leotiomycetes                          | 8.60  | 2.55  | 30.86 | 18.63 | 22.72 | 17.76 | 11.34 | 6.54 |
| Pezizomycetes                          | 3.38  | 5.72  | 0.24  | 0.14  | 2.64  | 3.46  | 1.74  | 2.68 |
| Sordariomycetes                        | 25.04 | 14.51 | 17.82 | 7.79  | 13.23 | 6.71  | 18.34 | 3.08 |
| <i>Basidiomycota</i>                   |       |       |       |       |       |       |       |      |
| Agaricomycetes                         | 14.88 | 15.30 | 4.46  | 2.04  | 4.37  | 1.17  | 1.52  | 1.87 |
| Microbotryomycetes                     | 0.49  | 0.10  | 0.51  | 0.42  | 0.34  | 0.10  | 0.30  | 0.19 |
| Tremellomycetes                        | 1.72  | 0.49  | 3.19  | 1.26  | 3.91  | 1.12  | 4.86  | 1.48 |
| <i>Zygomycota</i>                      |       |       |       |       |       |       |       |      |
| Mortierellomycotina_cls_Incertae_sedis | 4.20  | 2.50  | 4.80  | 1.68  | 9.56  | 11.92 | 3.58  | 2.81 |
| Mucoromycotina_cls_Incertae_sedis      | 0.09  | 0.07  | 0.20  | 0.23  | 0.08  | 0.07  | 0.40  | 0.56 |
| <i>Glomeromycota</i>                   |       |       |       |       |       |       |       |      |
| Glomeromycetes                         | 0.66  | 0.18  | 0.07  | 0.04  | 0.10  | 0.07  | 0.19  | 0.15 |

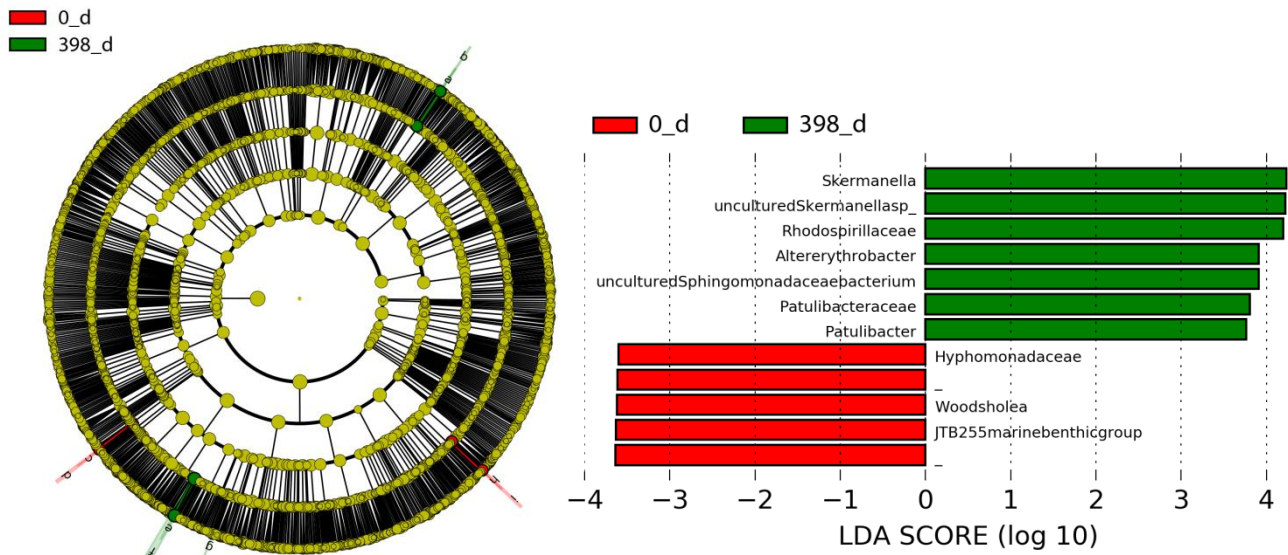

Figure S1. Linear discriminant analysis coupled with effect size (LEfSe) cladogram of bacterial taxa driving dissimilarity among inundation histories. Symbol diameter is proportional to relative abundance. Colors indicate inundation history, and brown symbols indicate non-significant taxa. 0 d and 398 d elevations contribute 100% of taxa driving dissimilarity.

Table S3. Mean and standard deviation of NPOC, Cl<sup>-</sup>, SO<sub>4</sub><sup>2-</sup>, NO<sub>3</sub><sup>-</sup>, NH<sub>4</sub><sup>+</sup>, Na<sup>+</sup>, Ca<sup>2+</sup>, Mg<sup>2+</sup>, K<sup>+</sup>, and respiration rate from 0.5hr and 25hr incubations. Treatments are indicated by RW (river water), GW (groundwater without NO<sub>3</sub><sup>-</sup>), and GWN (groundwater with NO<sub>3</sub><sup>-</sup>). All units are per g dry sediment. N=3 for all treatments except 0 days/ 25hr/ river water (n=2).

| Time since inundated | Incubation | Treatment | NPOC (mg) |          | Cl <sup>-</sup> (mg) |          | SO <sub>4</sub> <sup>2-</sup> (mg) |          | NO <sub>3</sub> <sup>-</sup> (mg) |          | NH <sub>4</sub> <sup>+</sup> (mg) |          | Na <sup>+</sup> (mg) |          | Ca <sup>2+</sup> (mg) |          | Mg <sup>2+</sup> (mg) |          | K <sup>+</sup> (mg) |          | Respiration rate (ppm CO <sub>2</sub> /min) |      |
|----------------------|------------|-----------|-----------|----------|----------------------|----------|------------------------------------|----------|-----------------------------------|----------|-----------------------------------|----------|----------------------|----------|-----------------------|----------|-----------------------|----------|---------------------|----------|---------------------------------------------|------|
|                      |            |           | Mean      | SD       | Mean                 | SD       | Mean                               | SD       | Mean                              | SD       | Mean                              | SD       | Mean                 | SD       | Mean                  | SD       | Mean                  | SD       | Mean                | SD       | Mean                                        | SD   |
| 0 days               | 0.5hr      | RW        | 5.85E-03  | 6.66E-04 | 7.96E-03             | 2.05E-03 | 2.28E-02                           | 6.66E-03 | 2.21E-02                          | 2.67E-02 | 1.63E-02                          | 7.93E-03 | 8.51E-03             | 1.26E-03 | 6.76E-03              | 1.95E-03 | 1.52E-03              | 4.68E-04 | 2.02E-03            | 2.94E-04 | 23.06                                       | 6.31 |
|                      |            | GW        | 4.53E-03  | 9.06E-04 | 1.27E-02             | 5.38E-03 | 2.66E-02                           | 7.32E-03 | 2.73E-02                          | 4.00E-02 | 1.52E-02                          | 4.82E-03 | 8.65E-03             | 2.57E-03 | 6.86E-03              | 3.01E-03 | 1.54E-03              | 6.07E-04 | 3.26E-03            | 1.02E-03 | 0.75                                        | 0.16 |
|                      |            | GWN       | 4.26E-03  | 1.17E-03 | 3.03E-02             | 1.97E-02 | 4.60E-02                           | 2.55E-02 | 5.52E-02                          | 8.68E-02 | 1.21E-02                          | 4.34E-03 | 1.02E-02             | 3.53E-03 | 6.50E-03              | 2.43E-03 | 1.45E-03              | 4.87E-04 | 2.40E-03            | 1.64E-03 | 26.92                                       | 8.73 |
|                      | 25hr       | RW        | 5.04E-03  | 1.43E-03 | 3.23E-02             | 8.26E-03 | 4.19E-02                           | 7.17E-03 | 5.86E-02                          | 9.68E-02 | 1.63E-02                          | 6.16E-03 | 1.19E-02             | 4.19E-03 | 8.65E-03              | 3.01E-03 | 1.95E-03              | 6.62E-04 | 4.02E-03            | 1.29E-03 | 0.88                                        | 0.27 |
|                      |            | GW        | 3.88E-03  | 1.07E-03 | 1.65E-02             | 5.38E-03 | 3.10E-02                           | 7.93E-03 | 3.58E-02                          | 4.69E-02 | 1.40E-02                          | 5.11E-03 | 8.98E-03             | 3.23E-04 | 6.19E-03              | 4.92E-04 | 1.38E-03              | 5.24E-05 | 1.69E-03            | 2.25E-04 | 22.84                                       | 6.35 |
|                      |            | GWN       | 7.25E-03  | 2.26E-03 | 2.72E-02             | 8.98E-03 | 4.35E-02                           | 8.25E-02 | 4.64E-02                          | 7.04E-02 | 1.68E-02                          | 4.31E-03 | 1.42E-02             | 2.07E-03 | 8.50E-03              | 2.74E-03 | 1.86E-03              | 7.53E-04 | 4.46E-03            | 1.72E-03 | 0.80                                        | 0.22 |
| 13 days              | 0.5hr      | RW        | 5.40E-03  | 1.33E-03 | 5.60E-03             | 2.65E-03 | 1.48E-02                           | 3.81E-03 | 2.12E-02                          | 2.06E-02 | 1.61E-02                          | 2.54E-03 | 8.42E-03             | 3.41E-03 | 1.19E-02              | 1.21E-02 | 1.18E-03              | 1.92E-04 | 1.95E-03            | 4.13E-04 | 9.53                                        | 1.88 |
|                      |            | GW        | 8.88E-03  | 2.96E-03 | 7.76E-03             | 6.11E-04 | 1.49E-02                           | 1.20E-03 | 2.26E-02                          | 2.83E-02 | 2.26E-02                          | 6.49E-03 | 5.86E-03             | 2.16E-03 | 8.20E-03              | 1.34E-04 | 1.92E-03              | 8.62E-05 | 3.00E-03            | 4.79E-04 | 0.48                                        | 0.04 |
|                      |            | GWN       | 5.51E-03  | 1.83E-03 | 1.96E-02             | 1.11E-03 | 2.59E-02                           | 1.80E-03 | 3.86E-02                          | 5.28E-02 | 1.63E-02                          | 3.21E-03 | 6.59E-03             | 9.84E-04 | 7.12E-03              | 3.56E-03 | 1.65E-03              | 8.91E-04 | 2.41E-03            | 1.14E-03 | 10.61                                       | 1.10 |
|                      | 25hr       | RW        | 7.95E-03  | 3.74E-03 | 2.30E-02             | 1.78E-03 | 3.00E-02                           | 1.92E-03 | 4.43E-02                          | 7.20E-02 | 2.06E-02                          | 4.31E-03 | 6.32E-03             | 3.48E-04 | 1.10E-02              | 4.62E-03 | 1.96E-03              | 3.08E-04 | 2.67E-03            | 7.83E-04 | 0.48                                        | 0.09 |
|                      |            | GW        | 5.53E-03  | 1.70E-03 | 1.26E-02             | 9.23E-03 | 2.14E-02                           | 1.57E-02 | 7.73E-03                          | 5.58E-03 | 9.99E-03                          | 7.27E-03 | 6.75E-03             | 6.82E-04 | 5.60E-03              | 2.71E-04 | 1.23E-03              | 4.95E-05 | 1.79E-03            | 6.08E-05 | 10.61                                       | 0.21 |
|                      |            | GWN       | 1.09E-02  | 5.84E-03 | 2.08E-02             | 4.69E-03 | 2.93E-02                           | 1.79E-03 | 2.90E-03                          | 1.39E-03 | 2.36E-02                          | 4.75E-03 | 6.17E-03             | 5.46E-04 | 1.12E-02              | 5.02E-03 | 2.80E-03              | 1.27E-03 | 4.03E-03            | 1.01E-03 | 0.59                                        | 0.04 |
| 127 days             | 0.5hr      | RW        | 9.49E-03  | 5.93E-03 | 7.50E-03             | 4.15E-04 | 2.04E-02                           | 3.02E-03 | 5.55E-02                          | 2.65E-02 | 1.88E-02                          | 1.17E-02 | 6.81E-03             | 1.91E-03 | 8.90E-03              | 3.65E-03 | 2.17E-03              | 1.10E-03 | 1.02E-02            | 5.04E-03 | 8.57                                        | 2.12 |
|                      |            | GW        | 1.05E-02  | 6.46E-03 | 8.16E-03             | 7.47E-04 | 1.67E-02                           | 4.95E-04 | 1.05E-02                          | 3.20E-03 | 1.05E-02                          | 6.09E-03 | 7.93E-03             | 2.49E-03 | 1.06E-02              | 3.77E-03 | 2.78E-03              | 1.24E-03 | 1.15E-02            | 4.00E-03 | 0.43                                        | 0.21 |
|                      |            | GWN       | 9.04E-03  | 5.16E-03 | 3.20E-02             | 5.86E-03 | 4.00E-02                           | 6.78E-03 | 4.87E-02                          | 2.38E-02 | 2.23E-02                          | 1.34E-02 | 1.25E-02             | 4.77E-03 | 9.86E-03              | 3.79E-03 | 2.51E-03              | 1.08E-03 | 9.87E-03            | 3.89E-03 | 9.31                                        | 2.17 |
|                      | 25hr       | RW        | 1.02E-02  | 6.68E-03 | 2.72E-02             | 7.82E-03 | 3.20E-02                           | 9.57E-03 | 9.71E-03                          | 6.29E-04 | 2.83E-02                          | 1.33E-02 | 8.37E-03             | 1.35E-03 | 1.09E-02              | 4.04E-03 | 2.88E-03              | 1.15E-02 | 1.15E-02            | 5.17E-03 | 0.48                                        | 0.23 |
|                      |            | GW        | 8.83E-03  | 5.54E-03 | 2.71E-02             | 5.03E-03 | 4.27E-02                           | 8.26E-03 | 6.03E-02                          | 1.42E-02 | 1.92E-02                          | 1.57E-02 | 1.15E-02             | 2.97E-03 | 1.09E-02              | 4.25E-03 | 2.72E-03              | 1.14E-03 | 1.06E-02            | 4.88E-03 | 7.46                                        | 2.23 |
|                      |            | GWN       | 1.27E-02  | 1.07E-02 | 2.33E-02             | 3.16E-03 | 3.40E-02                           | 6.20E-03 | 1.31E-02                          | 2.14E-03 | 2.52E-02                          | 7.59E-03 | 1.25E-02             | 3.88E-03 | 1.19E-02              | 5.03E-03 | 2.95E-03              | 1.22E-03 | 1.23E-02            | 6.43E-03 | 0.41                                        | 0.18 |
| 398 days             | 0.5hr      | RW        | 1.17E-02  | 5.60E-03 | 7.19E-03             | 3.68E-03 | 1.55E-02                           | 1.03E-02 | 4.87E-02                          | 1.02E-02 | 5.98E-03                          | 9.52E-03 | 3.91E-03             | 8.69E-03 | 3.71E-03              | 3.24E-03 | 3.09E-03              | 2.55E-02 | 1.57E-02            | 11.27    | 7.87                                        |      |
|                      |            | GW        | 1.24E-02  | 5.93E-03 | 7.53E-03             | 1.07E-03 | 1.31E-02                           | 3.99E-03 | 4.73E-02                          | 4.14E-02 | 1.53E-02                          | 8.77E-03 | 7.79E-03             | 1.93E-03 | 7.87E-03              | 2.15E-03 | 1.99E-03              | 5.41E-04 | 2.62E-02            | 1.21E-02 | 0.31                                        | 0.08 |
|                      |            | GWN       | 9.63E-03  | 3.36E-03 | 3.73E-02             | 1.26E-02 | 4.49E-02                           | 1.70E-02 | 1.36E-01                          | 1.04E-01 | 7.78E-03                          | 2.99E-03 | 1.04E-02             | 1.99E-03 | 8.98E-03              | 2.52E-03 | 2.97E-03              | 1.49E-03 | 2.74E-02            | 1.35E-02 | 7.66                                        | 1.96 |
|                      | 25hr       | RW        | 1.25E-02  | 4.81E-03 | 3.35E-02             | 8.60E-03 | 3.78E-02                           | 1.20E-02 | 4.70E-02                          | 4.93E-02 | 1.40E-02                          | 4.61E-03 | 1.22E-02             | 3.19E-03 | 1.20E-02              | 2.19E-02 | 3.98E-03              | 1.62E-03 | 3.02E-02            | 9.84E-03 | 0.37                                        | 0.12 |
|                      |            | GW        | 1.04E-02  | 3.28E-03 | 3.18E-02             | 1.13E-02 | 4.81E-02                           | 1.94E-02 | 1.59E-01                          | 1.04E-01 | 5.94E-02                          | 2.25E-03 | 1.05E-02             | 2.66E-02 | 2.07E-02              | 1.99E-02 | 2.34E-03              | 5.94E-04 | 2.60E-02            | 1.15E-02 | 8.65                                        | 0.87 |
|                      |            | GWN       | 1.06E-02  | 4.46E-03 | 2.66E-02             | 9.63E-03 | 3.48E-02                           | 1.74E-02 | 7.45E-02                          | 8.50E-02 | 1.32E-02                          | 7.21E-03 | 9.20E-03             | 8.08E-04 | 9.51E-03              | 1.64E-03 | 2.36E-03              | 4.33E-04 | 2.52E-02            | 1.05E-02 | 0.46                                        | 0.16 |
